# Supplementary material
Source: PubMed Central journal article supplement (PMC3572243)
Supplement: NIHMS433014-supplement-1_si_001.pdf [file NIHMS433014-supplement-1_si_001.pdf]

*Supplementary information for:*

**Design and Synthesis of Diverse Functional Kinked Nanowire  
Structures for Nanoelectronic Bioprobes**

*Lin Xu, Zhe Jiang, Quan Qing, Liqiang Mai, Qingjie Zhang, and Charles M. Lieber*

**This file includes:**

Supplementary Figures S1-S2

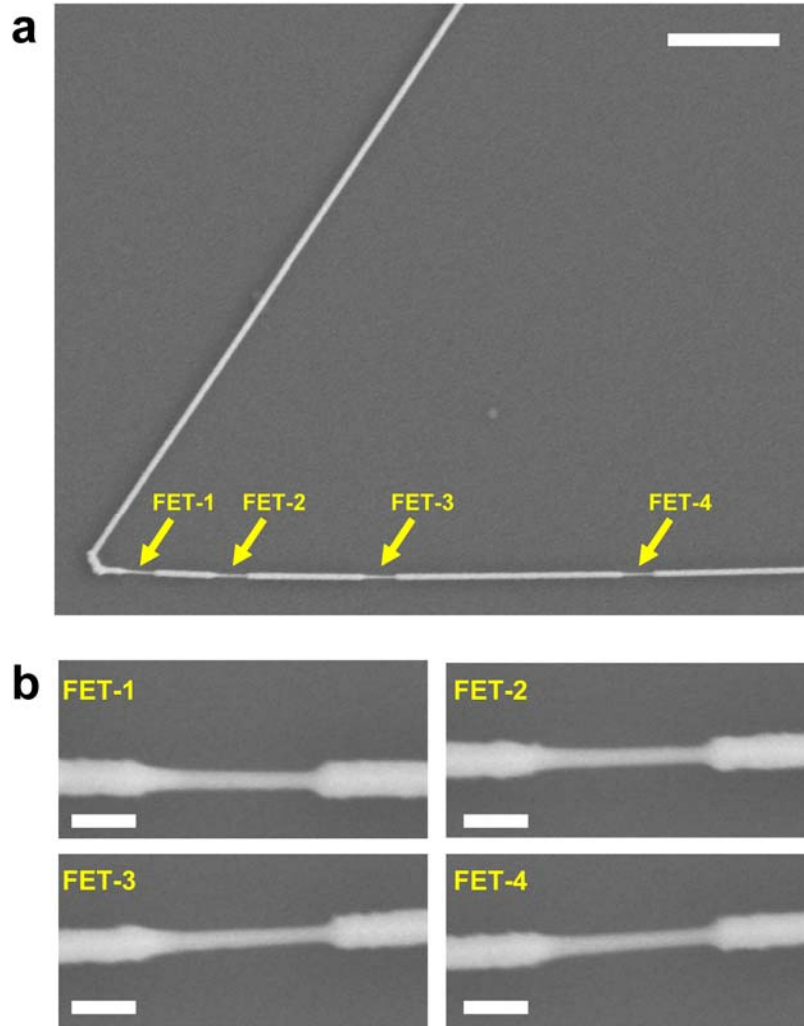

**Figure S1. Series multi-nanoFET functional KNW.** (a) Representative SEM image of a KOH-etched series multi-nanoFET KNW. The segments with smaller diameter correspond to preferentially-etched lightly-doped nanoFET elements. Scale bar, 2  $\mu\text{m}$ . (b) Magnified images of the 4 nanoFET elements marked with arrows in **a**. Scale bars, 200 nm. Series multi-nanoFET KNWs were dispersed from ethanol solutions onto the nitride surface of Si/SiO<sub>2</sub>/Si<sub>3</sub>N<sub>4</sub> substrates (NOVA Electronic Materials Inc.), and then etched in KOH solution to highlight the lightly-doped nanoFET sections (see reference-34, manuscript).

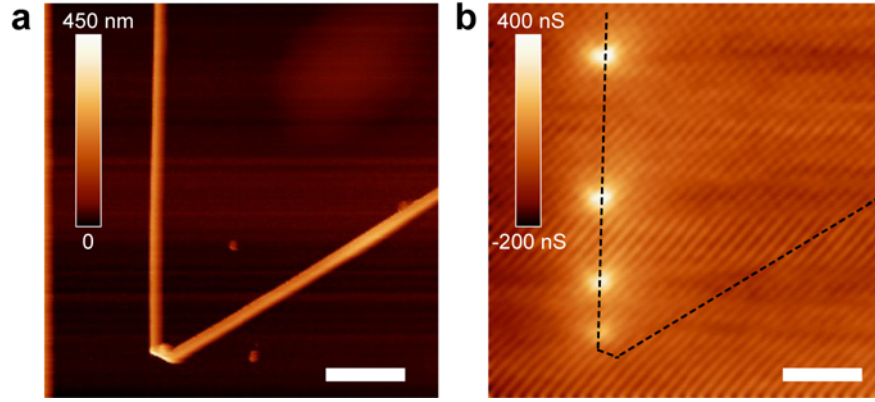

**Figure S2. Scanned probe microscopy characterization of a multi-nanoFET KNW.** (a) AFM image of series multi-nanoFET KNW. Scale bar, 2  $\mu\text{m}$ . Color scale (0 to 450 nm) corresponds to the z-height of the image; the KNW is  $\sim 150$  nm in diameter. (b) Corresponding SGM image of the multi-nanoFET KNW with  $V_{\text{tip}}$  of +10 V. Scale bar, 2  $\mu\text{m}$ . The bright regions in SGM image correspond to increased NW conductance. Color scale (-200 to 400 nS) corresponds to the conductance change. SGM measurements were made as described in reference-38 using a S/D voltage of 0.1 V.
